# Supplementary material for: Whole genomic comparative analysis of Streptococcus pneumoniae serotype 1 isolates causing invasive and non-invasive infections among children under 5 years in Casablanca, Morocco
Source: BMC Genomics. 2021 Jan 7;22:39. doi: 10.1186/s12864-020-07316-0 (PMC7792055; doi:10.1186/s12864-020-07316-0)
Supplement: Supplementary file 1 — Additional file 1. [file 12864_2020_7316_MOESM1_ESM.xlsx]

## Sheet: metadata
Metadata of S. pneumoniae serotype 1 isolates used in the study
tree_tip_label	Accession	Sample_ID	Year	Country	Region	Continent	Source	SC/ST	hierbaps_L	hierbaps_sL	fc_accessory
ERR023329.ias_l500	ERR023329	B10261	2004	Malawi	Blantyre	Africa	invasive	SC3	1	1	3
ERR023332.ias_l500	ERR023332	B19220	2009	Malawi	Blantyre	Africa	invasive	SC3	1	1	3
ERR023334.ias_l500	ERR023334	D51831	2009	Malawi	Blantyre	Africa	invasive	SC3	1	1	3
ERR023335.ias_l500	ERR023335	C18896	2008	Malawi	Blantyre	Africa	invasive	SC3	1	1	3
ERR023336.ias_l500	ERR023336	A47157	2007	Malawi	Blantyre	Africa	invasive	SC3	1	1	3
ERR023344.ias_l500	ERR023344	C17094	2007	Malawi	Blantyre	Africa	invasive	SC3	1	1	3
ERR023350.ias_l500	ERR023350	B11955a	2005	Malawi		Africa	invasive	SC3	1	1	3
ERR023357.ias_l500	ERR023357	B13691	2006	Malawi	Blantyre	Africa	invasive	SC3	1	1	3
ERR023358.ias_l500	ERR023358	C14599	2006	Malawi	Blantyre	Africa	invasive	SC3	1	1	3
ERR045791.ia_l500	ERR045791	D48470	2008	Malawi	Blantyre	Africa	invasive	SC3	1	1	3
ERR045792.ia_l500	ERR045792	A37225	2005	Malawi	Blantyre	Africa	invasive	SC3	1	1	3
ERR298108.ia_l500	ERR298108	4691	1997	Malawi		Africa		SC3	1	1	3
ERR298111.ia_l500	ERR298111	A25947	2003	Malawi	Blantyre	Africa	invasive	SC3	1	1	3
ERR298112.ia_l500	ERR298112	A59803	2010	Malawi	Blantyre	Africa	invasive	SC3	1	1	3
ERR298138.ia_l500	ERR298138	BBW12U	2011	Malawi	Blantyre	Africa	invasive	SC3	1	1	3
ERR298147.ia_l500	ERR298147	C474	1999	Malawi	Blantyre	Africa	invasive	SC3	1	1	3
ERR298168.ia_l500	ERR298168	C5496	2002	Malawi	Blantyre	Africa	invasive	SC3	1	1	3
ERR298172.ia_l500	ERR298172	A12283	2001	Malawi	Blantyre	Africa	invasive	SC3	1	1	3
ERR298173.ia_l500	ERR298173	A58029	2010	Malawi	Blantyre	Africa	invasive	SC3	1	1	3
ERR298185.ia_l500	ERR298185	B352	1998	Malawi	Blantyre	Africa	invasive	SC3	1	1	3
ERR298202.ia_l500	ERR298202	D7954	2000	Malawi	Blantyre	Africa	invasive	SC3	1	1	3
ERR223030.ia_l500	ERR223030	PATH5420	2010	Mozambique		Africa	invasive	SC3	1	1	3
ERR223033.ia_l500	ERR223033	PATH5433	2010	Mozambique		Africa	invasive	SC3	1	1	3
ERR226366.ia_l500	ERR226366	PATH597	2006	Mozambique		Africa	invasive	SC3	1	1	3
ERR226370.ia_l500	ERR226370	PATH614	2006	Mozambique		Africa	invasive	SC3	1	1	3
ERR226383.ia_l500	ERR226383	PATH722	2007	Mozambique		Africa	invasive	SC3	1	1	3
ERR226385.ia_l500	ERR226385	PATH734	2007	Mozambique		Africa	invasive	SC3	1	1	3
ERR298081.ia_l500	ERR298081	PATH5604	2008	Mozambique		Africa	invasive	SC3	1	1	3
ERR023605.ias_l500	ERR023605	44A170607	2007	South Africa	Gauteng	Africa	invasive	SC3	1	1	3
ERR042143.ia_l500	ERR042143	PSP_1881	2009	The Gambia	Upper Region Division	Africa	invasive	SC3	1	1	3
ERR042186.ia_l500	ERR042186	PNI_643	2005	The Gambia	Western Division	Africa	invasive	SC3	1	1	3
ERR042203.ia_l500	ERR042203	PNI_830	2009	The Gambia	Western Division	Africa	lung aspirate	SC3	1	1	3
ERR298074.ia_l500	ERR298074	PATH5524	2008	Mozambique		Africa	invasive	SC3	1	1	3
ni_Morocco_3	ERS330796	CASMOR3	2008	Morocco	Casablanca	Africa	protected distal bronchial sample	ST2084	1	2	4
ERR226372.ia_l500	ERR226372	PATH621	2006	Mozambique		Africa	invasive	SC1	1	2	4
ERR298075.ia_l500	ERR298075	PATH5550	2008	Mozambique		Africa	invasive	SC1	1	2	5
ERR023354.ias_l500	ERR023354	64P171208	2008	South Africa	Gauteng	Africa	invasive	SC1	1	2	5
ERR023572.ias_l500	ERR023572	11A051104	2004	South Africa	Gauteng	Africa	invasive	SC1	1	2	5
ERR023576.ias_l500	ERR023576	3P200204	2004	South Africa	Western Cape	Africa	invasive	SC1	1	2	5
ERR023577.ias_l500	ERR023577	4A240304	2004	South Africa	KwaZulu-Natal	Africa	Other	SC1	1	2	5
ERR023582.ias_l500	ERR023582	33A040706	2006	South Africa	Gauteng	Africa	invasive	SC1	1	2	5
ERR023585.ias_l500	ERR023585	36P280806	2006	South Africa	Mpumalanga	Africa	invasive	SC1	1	2	5
ERR023589.ias_l500	ERR023589	29A310106	2006	South Africa	Gauteng	Africa	invasive	SC1	1	2	5
ERR023598.ias_l500	ERR023598	48A300907	2007	South Africa	Gauteng	Africa	invasive	SC1	1	2	5
ERR023599.ias_l500	ERR023599	49A220807	2007	South Africa	KwaZulu-Natal	Africa	invasive	SC1	1	2	5
ERR023603.ias_l500	ERR023603	42P230507	2007	South Africa	Gauteng	Africa	invasive	SC1	1	2	5
ERR023610.ias_l500	ERR023610	59A061008	2008	South Africa	Gauteng	Africa	invasive	SC1	1	2	5
ERR023613.ias_l500	ERR023613	62A271008	2008	South Africa	North West	Africa	invasive	SC1	1	2	5
ERR357213.ia_l500	ERR357213	26P291005	2005	South Africa	Western Cape	Africa	invasive	SC1	1	2	5
ERR357217.ia_l500	ERR357217	19P150405	2005	South Africa	Eastern Cape	Africa	invasive	SC1	1	2	5
ERR357219.ia_l500	ERR357219	21A150705	2005	South Africa	Gauteng	Africa	invasive	SC1	1	2	5
ERR226338.ias_l500	ERR226338	PATH385	1999	Egypt		Africa	invasive	SC2	1	3	4
ERR223008.ia_l500	ERR223008	PATH4231	2006	Ethiopia		Africa	nasopharynx	SC2	1	3	4
ERR223007.ia_l500	ERR223007	PATH4156	2006	Ethiopia		Africa	nasopharynx	SC4	1	3	4
ni_Ethiopia_1	ERS133152	PATH4231	2006	Ethiopia		Africa	nasopharynx	SC2	1	3	4
ni_Ethiopia_2	ERS133151	PATH4156	2006	Ethiopia		Africa	nasopharynx	SC4	1	3	4
ERR128828.ia_l500	ERR128828	SP1600	2010	Ghana	Upper East region	Africa	invasive	SC2	1	3	4
ERR128832.ia_l500	ERR128832	SP1621	2010	Ghana	Upper East region	Africa	invasive	SC2	1	3	4
ERR128844.ias_l500	ERR128844	SP1610	2010	Ghana	Upper East region	Africa	invasive	SC2	1	3	4
ERR298083.ia_l500	ERR298083	PATH5620	2009	Mozambique		Africa	invasive	SC2	1	3	4
ERR046715.ia_l500	ERR046715	NIG1712-03	2003	Niger	Niamey	Africa	invasive	SC2	1	3	4
ERR046721.ia_l500	ERR046721	NIG98-05	2005	Niger	Niamey	Africa	invasive	SC2	1	3	4
ERR046725.ia_l500	ERR046725	NIG378-05	2005	Niger	Niamey	Africa	invasive	SC2	1	3	4
ERR046728.ia_l500	ERR046728	NIG545-05	2005	Niger	Tahoua	Africa	invasive	SC2	1	3	4
ERR059367.ia_l500	ERR059367	NIG137-07	2007	Niger	Niamey	Africa	invasive	SC2	1	3	4
ERR059368.ia_l500	ERR059368	NIG779-07	2007	Niger	Niamey	Africa	invasive	SC2	1	3	4
ERR059369.ia_l500	ERR059369	NIG38-08	2008	Niger	Niamey	Africa	invasive	SC2	1	3	4
ERR059371.ia_l500	ERR059371	NIG656-08	2008	Niger	Niamey	Africa	invasive	SC2	1	3	4
ERR059373.ia_l500	ERR059373	NIG460-09	2009	Niger	Niamey	Africa	invasive	SC2	1	3	4
ERR059376.ia_l500	ERR059376	NIG14-04	2004	Niger	Niamey	Africa	invasive	SC2	1	3	4
ERR042162.ia_l500	ERR042162	N2100A	2009	Nigeria	South West	Africa	nasopharynx	SC2	1	3	4
ni_Nigeria_1	ERS024689	N2100A	2009	Nigeria		Africa	nasopharynx	SC2	1	3	4
ni_Nigeria_2	ERR042163	N1335A	2009	Nigeria		Africa	nasopharynx	SC2	1	3	4
ERR357218.ia_l500	ERR357218	20A100605	2005	South Africa	Gauteng	Africa	invasive	SC2	1	3	4
ERR042183.ia_l500	ERR042183	SVT_23964	2006	The Gambia	Western Division	Africa	nasopharynx	SC2	1	3	4
Morocco_7	ERS330800	CASMOR7	2012	Morocco	Casablanca	Africa	Cerebrospinal fluid	ST306	2	4	1
Morocco_1	ERS330794	CASMOR1	2007	Morocco	Casablanca	Africa	Blood	ST306	2	4	2
Morocco_5	ERS330798	CASMOR5	2008	Morocco	Casablanca	Africa	Blood	ST306	2	4	2
Morocco_4	ERS330797	CASMOR4	2009	Morocco	Casablanca	Africa	Blood	ST306	2	5	2
Morocco_6	ERS330799	CASMOR6	2009	Morocco	Casablanca	Africa	Blood	ST306	2	5	2
